# Supplementary material for: A coherent transcriptional feed-forward motif model for mediating auxin-sensitive PIN3 expression during lateral root development
Source: PubMed Central journal article supplement (PMC4673502; doi:10.1038/ncomms9821), 2015-11-18
Supplement: ncomms9821-s1.pdf [file ncomms9821-s1.pdf]

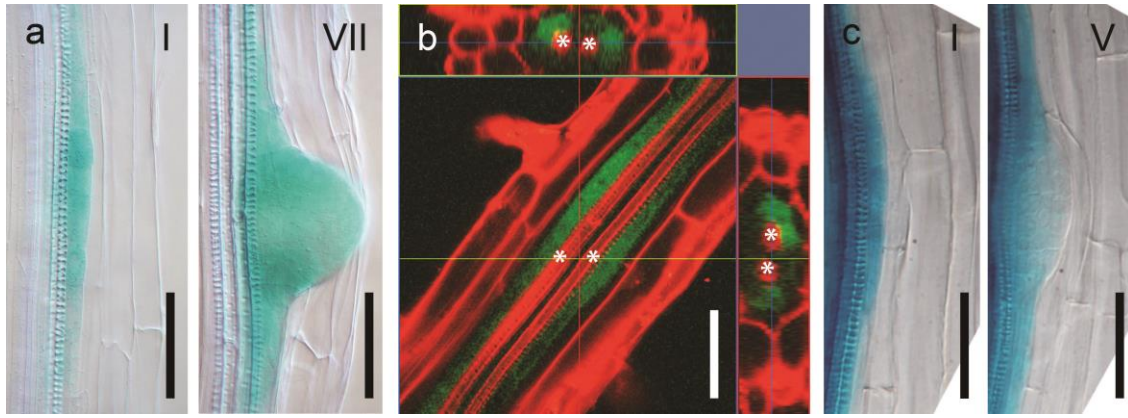

**Supplementary Figure 1** (a) Expression pattern of *proFLP::GUS-GFP* in stage I and VII of LR development. (b) Z-stack analysis of *proFLP::GUS-GFP* treated with 10μM NAA for 6h. Asteriks indicate xylem strands. (c) Expression pattern of *proMYB88::GUS-GFP* in stage I and V of LR development. Scale bar = 50 μm

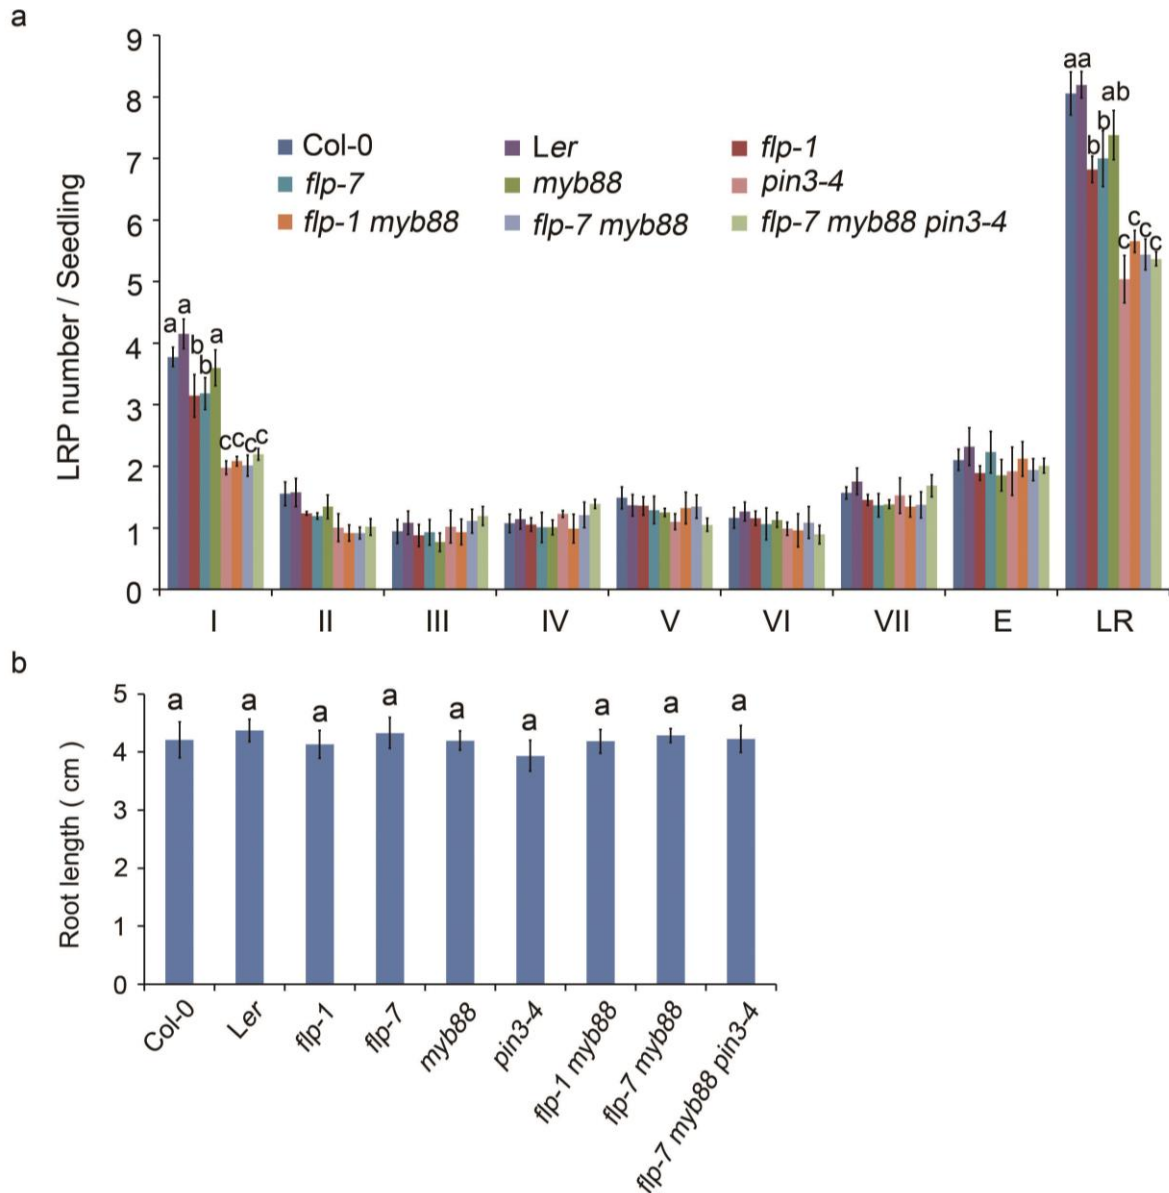

**Supplementary Figure 2** Root phenotyping of 6-day-old seedlings of Col-0, *Ler*, *flp-1*, *flp-7*, *myb88*, *pin3-4*, *flp-1 myb88*, *flp-7 myb88*, *pin3-4* and *flp-7 myb88 pin3-4*. (a) the number of different LR stages per seedling, and (b) corresponding main root lengths. E = just emerged, not yet mature LRs; LR = mature LRs. Data corresponding to the densities depicted in Figure 1. Data shown are average and s.d. of at least three independent experiments, each time sampling ( $n \geq 20$ ). Samples with different letters are significantly different:  $p < 0.05$  (Fisher's LSD mean separation test).

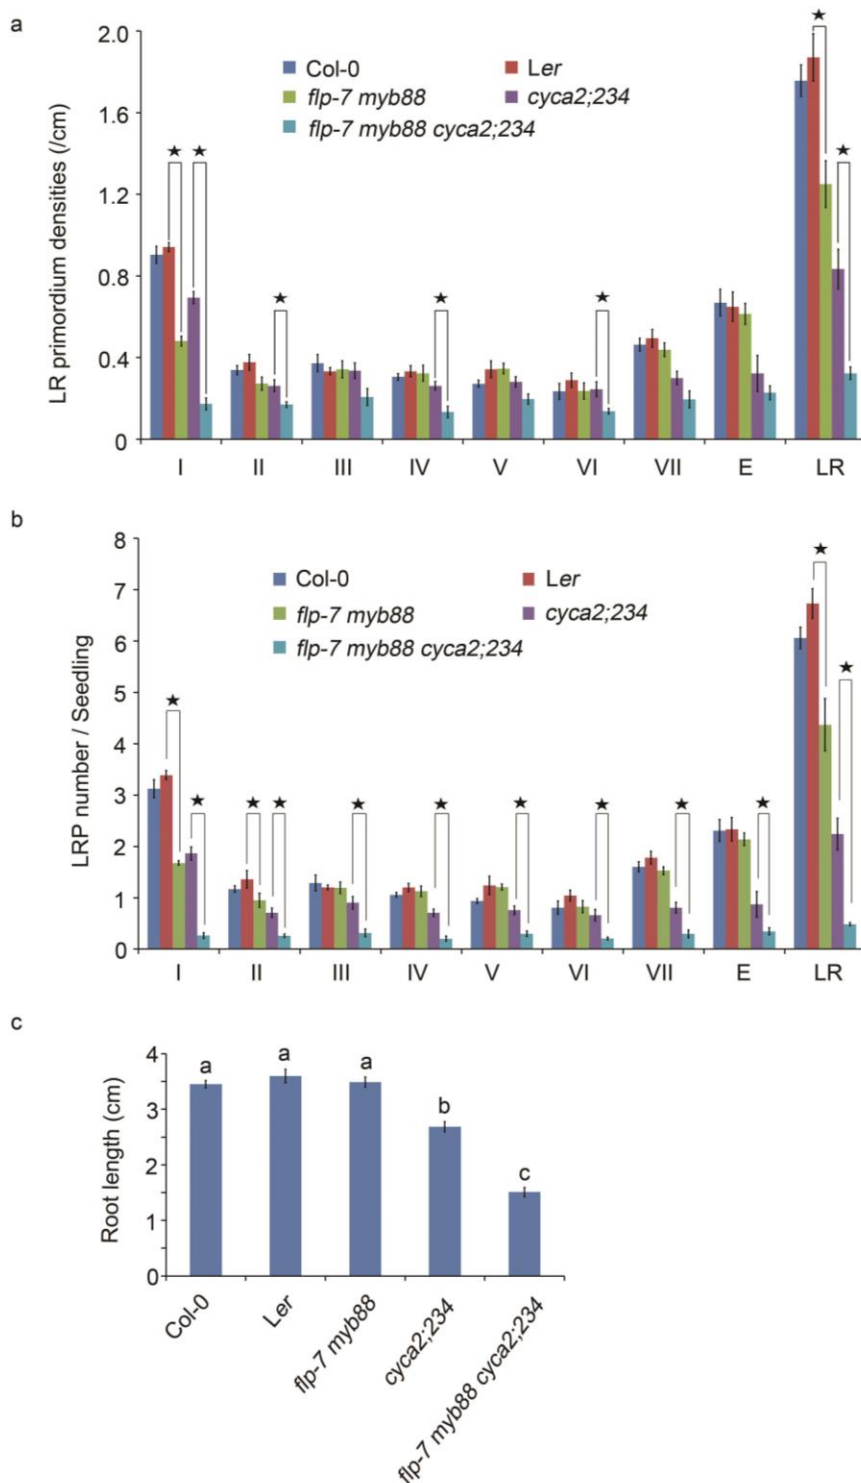

**Supplementary Figure 3** Root phenotyping of 6-day-old seedlings of Col-0, *Ler*, *flp-7 myb88*, *cyca2;234* and *flp-7 myb88 cyca2;234*. (a) LR primordium densities, (b) number of LRPs per seedling, and (c) primary root lengths of the respective genotypes. E = just emerged, not yet mature LR; LR = mature LR. Data shown are average and s.d. and are representative of at least three independent experiments. Asterisks denote Student's *t*-test significance: \*  $p < 0.001$  ( $n > 20$ ). Samples with different letters are significantly different:  $p < 0.05$  (Fisher's LSD mean separation test).

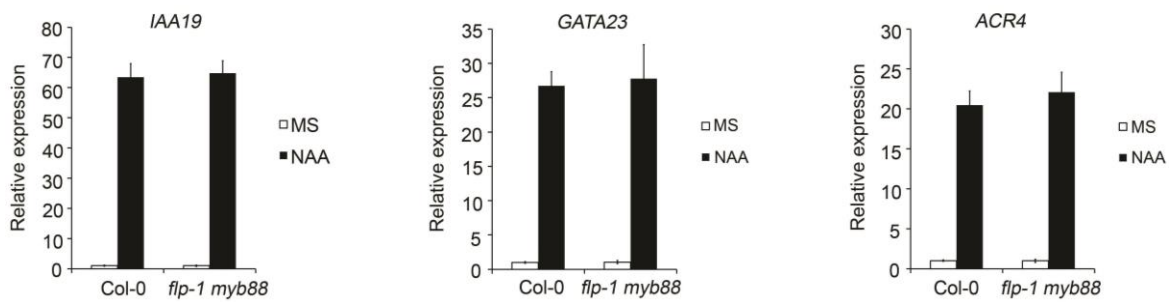

**Supplementary Figure 4** Transcriptional response to auxin treatment in WT and *flp-1 myb88* roots for *IAA19*, *GATA23* and *ACR4*. Six-day-old seedlings were treated with 10  $\mu$ M NAA for 6 hours, and roots were sampled for RNA extraction. Expression levels were normalised to *Col-0* (MS). Data shown are average and s.d. and are representative of at least three independent experiments.

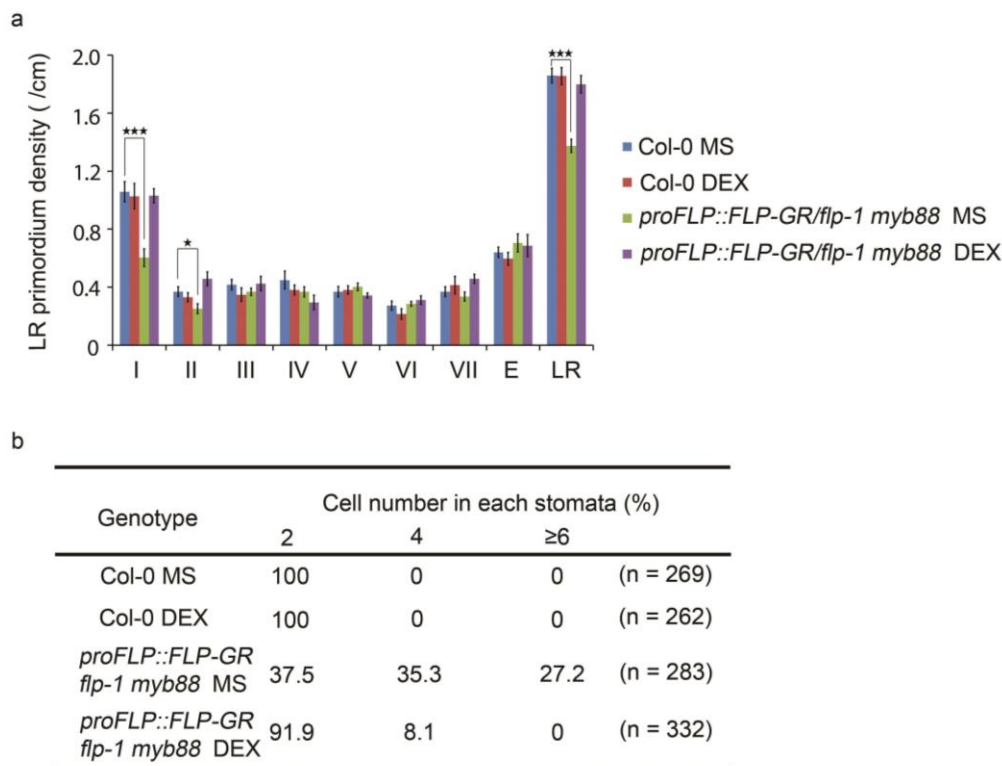

**Supplementary Figure 5** Phenotypic analyses of *proFLP::FLP-GR/flp-1 myb88* with DEX treatment. (a) Densities of the different stages of lateral root development in 6-day-old seedlings of *Col-0* and *proFLP::FLP-GR/flp-1 myb88* germinated on MS medium with or without 2  $\mu$ M DEX. E = just emerged, not yet mature LRs; LR = mature LRs. Data shown are average and s.d. and are representative of at least three independent experiments (n>20). Asterisks denote Student's *t* test significance: \* p < 0.05 and \*\*\* p < 0.001. (b) Numbers of cells in stomatal complex of *Col-0* and *proFLP::FLP-GR/flp-1 myb88* germinated on medium with or without 2  $\mu$ M DEX for 8 days.

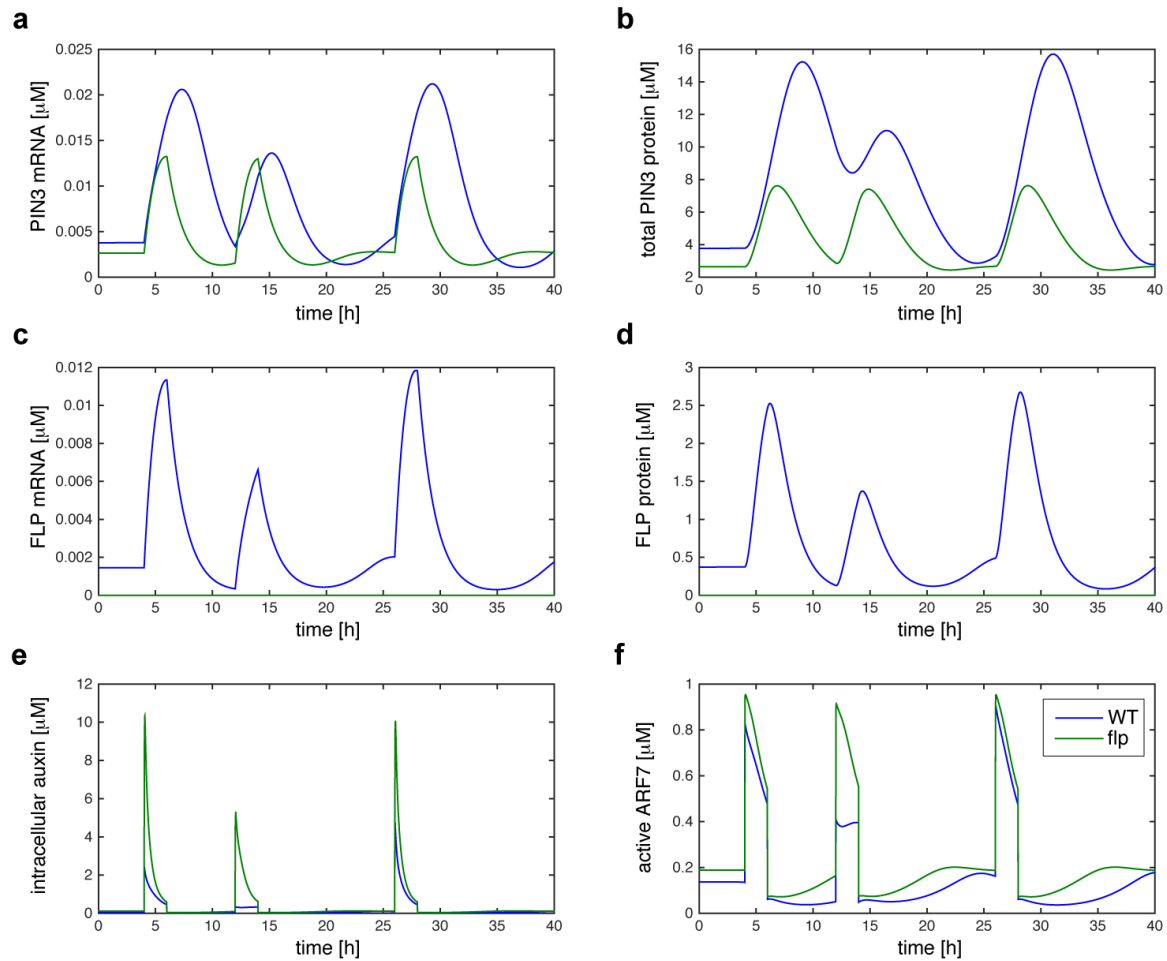

**Supplementary Figure 6** Model simulations with (blue) and without (green) the FLP feed-forward circuit. Model parameters are as in Figure 6, except for the half-max constants of the transcriptional circuitry, which were doubled to  $K_{AF} = 0.6 \mu\text{M}$ ,  $K_{AP} = 0.6 \mu\text{M}$  and  $K_{FP} = 1.2 \mu\text{M}$ . The resulting system dynamics are qualitatively the same as in Figure 6.

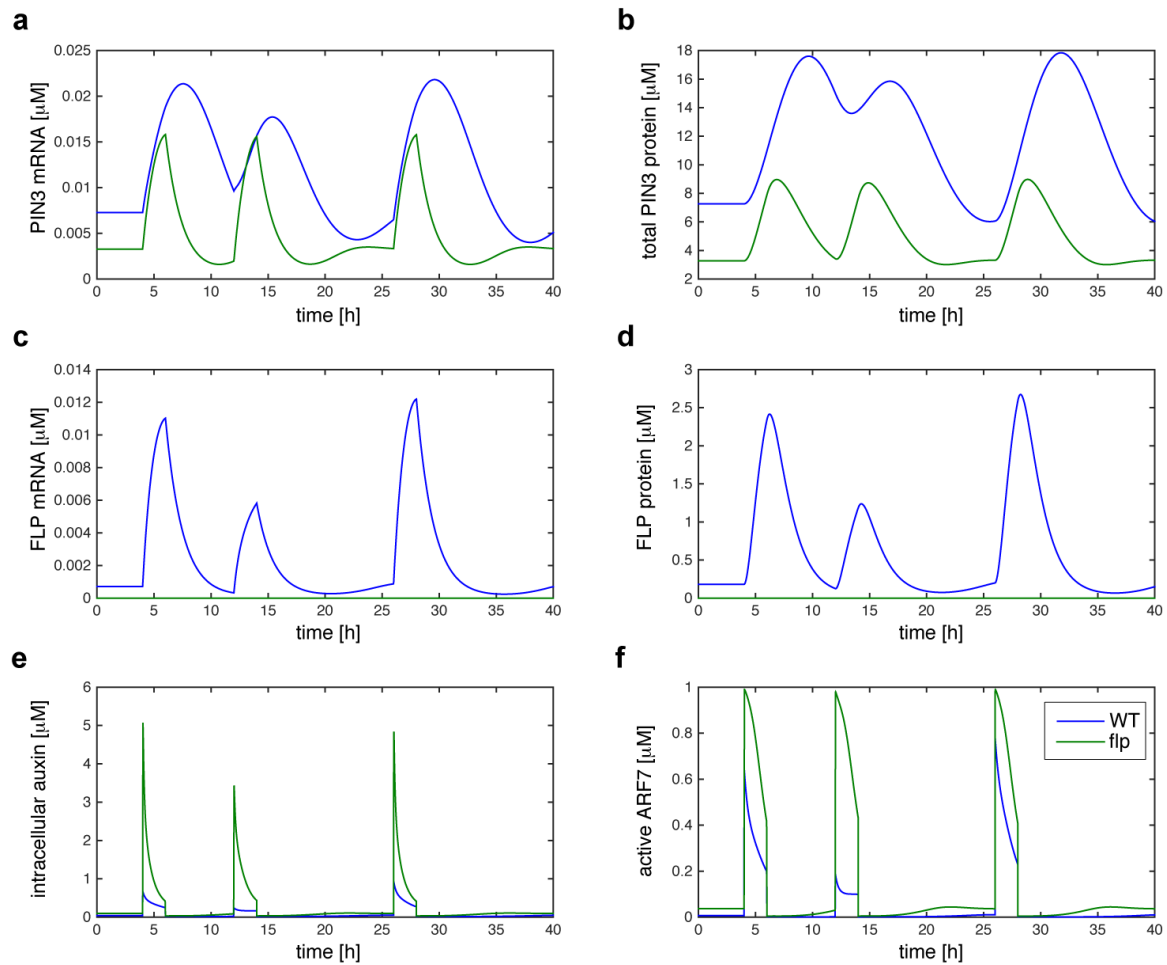

**Supplementary Figure 7** Model simulations with (blue) and without (green) the FLP feed-forward circuit. Model parameters are as in Figure 6, except for the Hill coefficients of the transcriptional circuitry, auxin-dependent ARF7 activation and PIN3 membrane localization, which were switched to  $n_2 = n_3 = n_4 = 1$  and  $n_1 = n_5 = 2$ . The resulting system dynamics are qualitatively the same as in Figure 6.

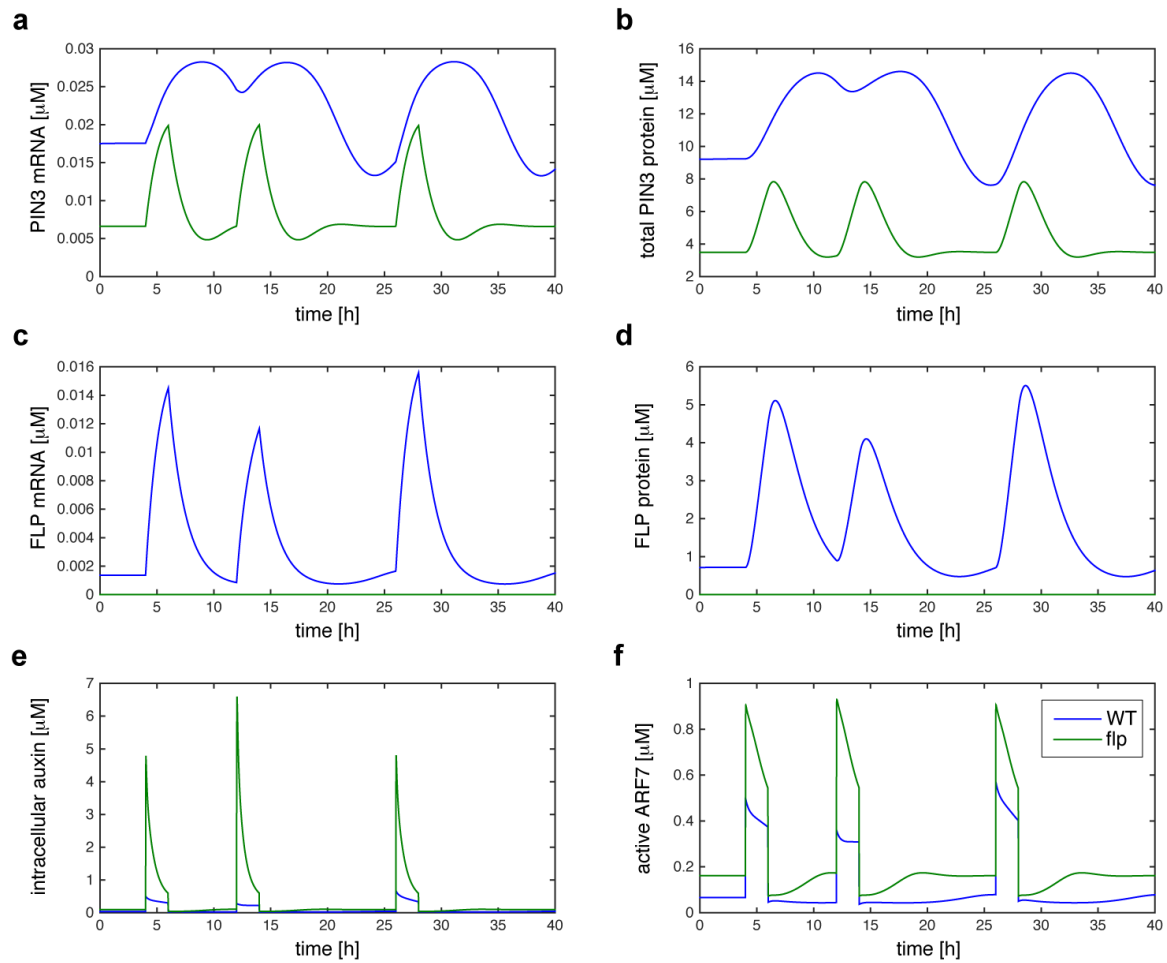

**Supplementary Figure 8** Model simulations with (blue) and without (green) the FLP feed-forward circuit. Model parameters are as in Figure 6, except for the PIN3 and FLP protein degradation rates, which were equalized to  $\delta_{\text{PIN3}} = \delta_{\text{FLP}} = 1.9 \times 10^{-4} \text{ s}^{-1}$ . The resulting system dynamics are qualitatively the same as in Figure 6.

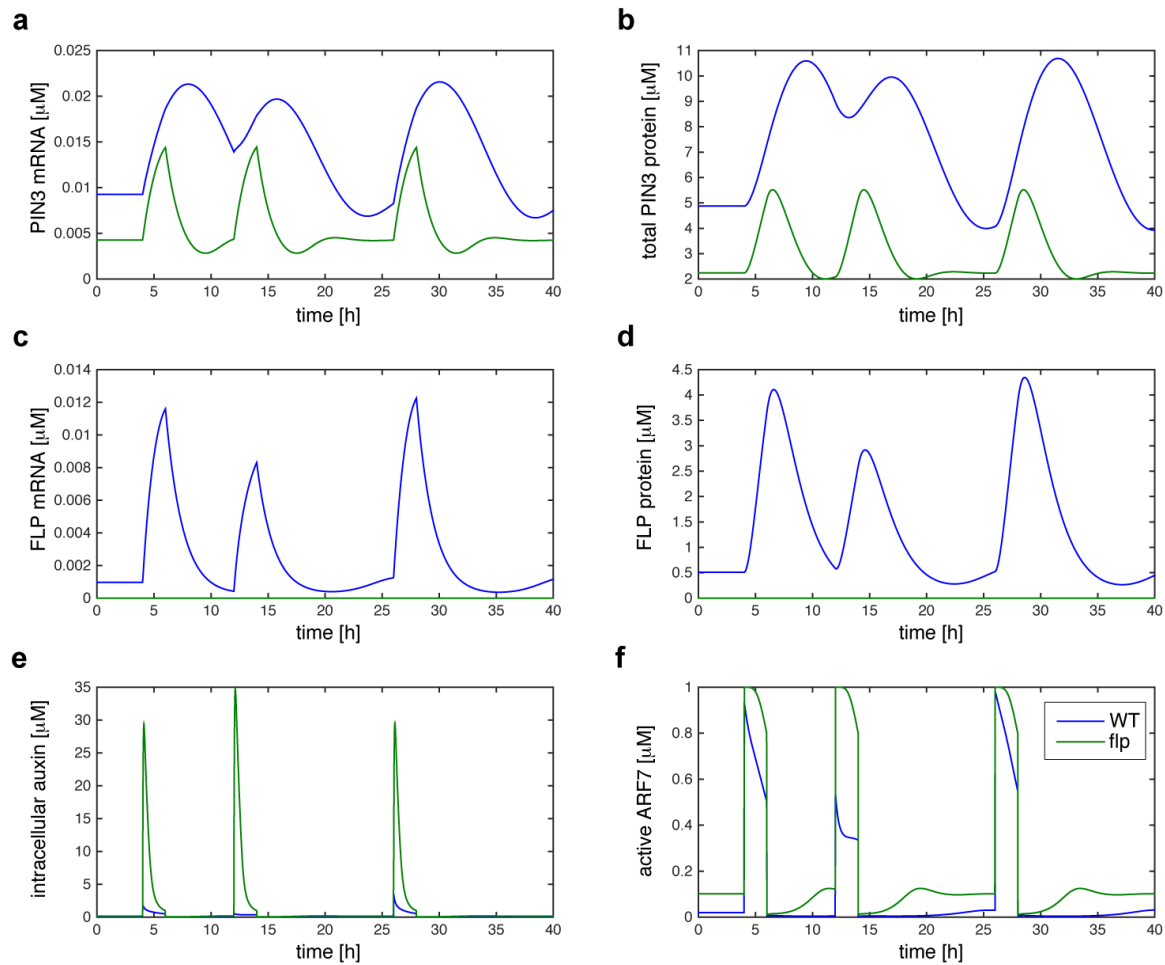

**Supplementary Figure 9** Model simulations with (blue) and without (green) the FLP feed-forward circuit, combining the parameter modifications used in Supplementary Figures 6-8. The resulting system dynamics are qualitatively the same as in Figure 6.



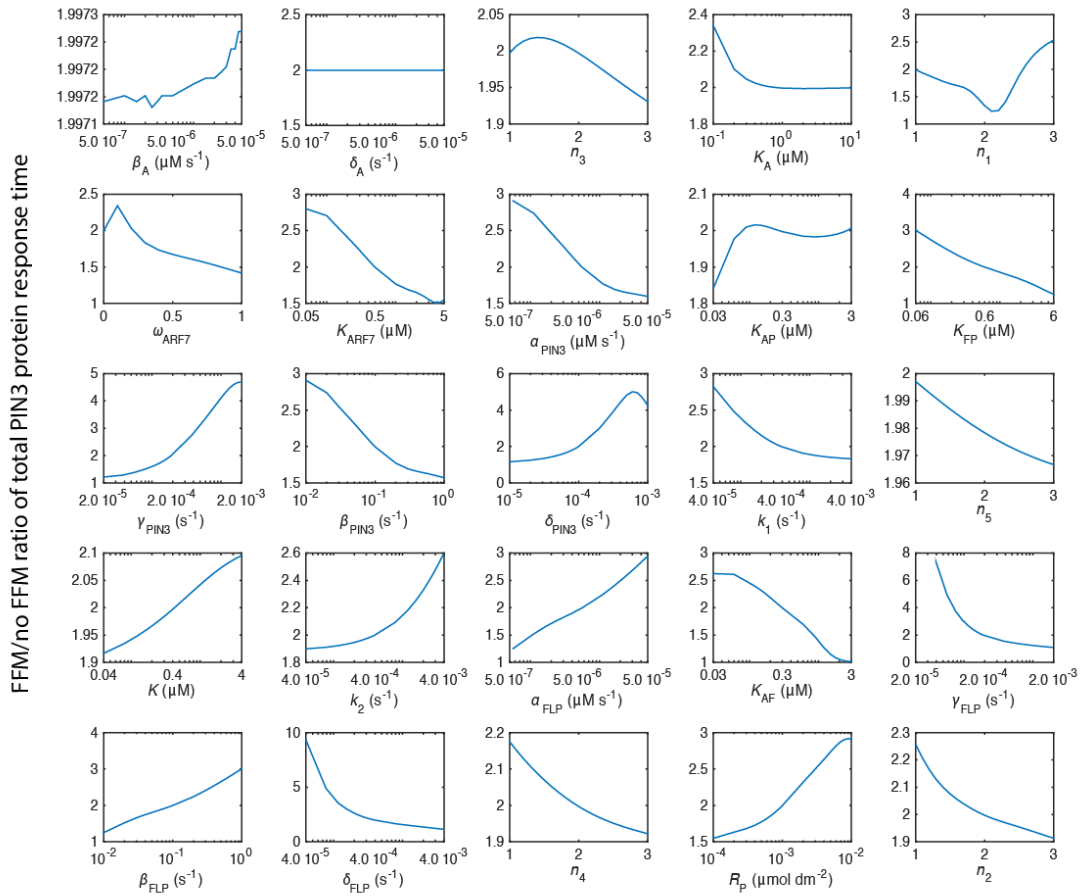

**Supplementary Figure 10** Ratio of total PIN3 protein concentration response time for circuits with and without feed-forward motif (FFM) upon auxin stimulus removal, as a function of single parameter deviations from the default values listed in Supplementary Table 1. Ratios  $>1$  indicate that the circuit with feed-forward motif exhibits a delayed response upon stimulus shutdown, i.e. a delayed decrease of PIN3 protein concentration. For none of the parameters, the response time ratio drops below 1 in the parameter range profiled, indicating that the PIN3 response delay is a robust feature of the FLP feed-forward motif circuit. The leftmost data point for  $\gamma_{FLP}$  ( $\gamma_{FLP} = 1.9 \times 10^{-5} \text{ s}^{-1}$ ) is missing because the PIN3 protein concentration in the FFM case did not halve within the 40h simulation timeframe.

**Supplementary Table 1:** Model parameter definitions and default values. Parameter values taken from literature are referenced in the last column.

| Parameter               | Definition                                                                                                       | Default Value                              | Ref  |
|-------------------------|------------------------------------------------------------------------------------------------------------------|--------------------------------------------|------|
| $\beta_A$               | intracellular auxin production rate                                                                              | $0 \mu\text{M s}^{-1}$                     |      |
| $\delta_A$              | intracellular auxin degradation rate constant                                                                    | $5 \times 10^{-6} \text{ s}^{-1}$          | 1    |
| $\frac{a}{V}$           | cell surface/volume ratio (round cell with 100 $\mu\text{m}$ diameter)                                           | $0.06 \mu\text{m}^{-1}$                    |      |
| $p_{AH}$                | membrane permeability AH (auxin acidic form)                                                                     | $3.3 \times 10^1 \mu\text{m s}^{-1}$       | 2    |
| $p_{A^-}$               | membrane permeability $A^-$ (auxin anionic form) at the reference $\text{PIN3}_{\text{mem}}$ concentration $R_P$ | $1.24 \times 10^1 \mu\text{m s}^{-1}$      | 2    |
| $R_P$                   | reference $\text{PIN3}_{\text{mem}}$ concentration                                                               | $1.0 \times 10^{-3} \mu\text{mol dm}^{-2}$ |      |
| $f_{AH}^{\text{wall}}$  | fraction AH/A in walls                                                                                           | 0.334                                      | 2    |
| $f_{AH}^{\text{cell}}$  | fraction AH/A in cells                                                                                           | 0.003                                      | 2    |
| $f_{A^-}^{\text{wall}}$ | fraction $A^-$ /A in walls                                                                                       | 0.666                                      | 2    |
| $f_{A^-}^{\text{cell}}$ | fraction $A^-$ /A in cells                                                                                       | 0.997                                      | 2    |
| $N_{\text{influx}}$     | electrochemical factor for auxin influx                                                                          | 0.07                                       | 2    |
| $N_{\text{efflux}}$     | electrochemical factor for auxin efflux                                                                          | 4.0                                        | 2    |
| $K_A$                   | half-max Michaelis-Menten constant for $\text{PIN3}$ -mediated transport of anionic auxin                        | $1.0 \mu\text{M}$                          | 2, 3 |
| $ARF7$                  | constant ARF7 protein concentration                                                                              | $1.0 \mu\text{M}$                          |      |
| $\omega_{ARF7}$         | basal, auxin-independent ARF7 activity                                                                           | 0                                          |      |
| $K_{ARF7}$              | half-max constant for auxin-dependent ARF7 activation                                                            | $0.5 \mu\text{M}$                          |      |
| $n_1$                   | Hill coefficient for auxin-dependent ARF7 activation                                                             | 1                                          |      |
| $\alpha_{FLP}$          | maximum <i>FLP</i> mRNA synthesis rate                                                                           | $5.6 \times 10^{-6} \mu\text{M s}^{-1}$    |      |
| $\gamma_{FLP}$          | <i>FLP</i> mRNA degradation rate constant                                                                        | $1.9 \times 10^{-4} \text{ s}^{-1}$        |      |
| $K_{AF}$                | half-max constant for $ARF7_{\text{act}}$ -dependent activation of <i>FLP</i> transcription                      | $0.3 \mu\text{M}$                          |      |
| $n_2$                   | Hill coefficient for $ARF7_{\text{act}}$ -dependent activation of <i>FLP</i> transcription                       | 2                                          |      |
| $\beta_{FLP}$           | <i>FLP</i> protein synthesis rate constant                                                                       | $1.0 \times 10^{-1} \text{ s}^{-1}$        |      |
| $\delta_{FLP}$          | <i>FLP</i> protein degradation rate constant                                                                     | $3.9 \times 10^{-4} \text{ s}^{-1}$        |      |
| $\alpha_{PIN3}$         | maximum <i>PIN3</i> mRNA synthesis rate                                                                          | $5.6 \times 10^{-6} \mu\text{M s}^{-1}$    |      |

|                 |                                                                                                     |                                     |   |
|-----------------|-----------------------------------------------------------------------------------------------------|-------------------------------------|---|
| $\gamma_{PIN3}$ | <i>PIN3</i> mRNA degradation rate constant                                                          | $1.9 \times 10^{-4} \text{ s}^{-1}$ |   |
| $K_{AP}$        | half-max constant for <i>ARF7</i> <sub>act</sub> -dependent activation of <i>PIN3</i> transcription | 0.3 $\mu\text{M}$                   |   |
| $n_3$           | Hill coefficient for <i>ARF7</i> <sub>act</sub> -dependent activation of <i>PIN3</i> transcription  | 2                                   |   |
| $K_{FP}$        | half-max constant for FLP-dependent activation of <i>PIN3</i> transcription                         | 0.6 $\mu\text{M}$                   |   |
| $n_4$           | Hill coefficient for FLP-dependent activation of <i>PIN3</i> transcription                          | 2                                   |   |
| $\beta_{PIN3}$  | <i>PIN3</i> protein synthesis rate constant                                                         | $1.0 \times 10^{-1} \text{ s}^{-1}$ |   |
| $\delta_{PIN3}$ | <i>PIN3</i> protein degradation rate constant                                                       | $1.0 \times 10^{-4} \text{ s}^{-1}$ |   |
| $k_1$           | <i>PIN3</i> membrane localization rate                                                              | $3.9 \times 10^{-4} \text{ s}^{-1}$ |   |
| $k_2$           | maximum <i>PIN3</i> internalization rate                                                            | $3.9 \times 10^{-4} \text{ s}^{-1}$ |   |
| $K$             | half-max constant for extracellular auxin effect on <i>PIN3</i> internalization                     | 0.4 $\mu\text{M}$                   | 2 |
| $n_5$           | Hill coefficient for <i>PIN3</i> internalization                                                    | 1                                   |   |

**Supplementary Table 2: List of primers used**

| <b>Cloning</b>     |                                                                  |
|--------------------|------------------------------------------------------------------|
| proFLP-F           | GGGGACAACCTTTGTATAGAAAAGTTGGATACATCTACCT<br>ATTTATTGCGCGTAC      |
| proFLP-R           | GGGGACTGCTTTTTTTGTACAAACTTGTTTTCTTCTTCTTCT<br>TTCTTACTACTGTCTC   |
| FLP-F              | GGGGACAAGTTTGTACAAAAAAGCAGGCTTGATGGAAGA<br>TACGAAGAAGAAAAAGAA    |
| FLP-R              | GGGGACCACTTTGTACAAGAAAGCTGGGTACAAGCTATG<br>GAGAAGGACTCTT         |
| FLP-R2 (with stop) | GGGGACCACTTTGTACAAGAAAGCTGGGTATTACAAGCT<br>ATGGAGAAGGACTCTT      |
| ARF7-F             | GGGGACAAGTTTGTACAAAAAAGCAGGCTTGATGAAAGC<br>TCCTTCATCAAATGGAGTTTC |
| ARF7-R             | GGGGACCACTTTGTACAAGAAAGCTGGGTATCACCGGTT<br>AAACGAAGTGGCTGAGT     |
| proPIN3_FL_F       | GGGGACAAGTTTGTACAAAAAAGCAGGCTAGCAACACTA                          |

|                   |                                                       |
|-------------------|-------------------------------------------------------|
|                   | AGTCACAAGA                                            |
| proPIN3_FL_R      | GGGGACCACTTTGTACAAGAAAGCTGGGTCTTGAAGGGA<br>CAAAAATGGA |
| <b>CHIP-Q-PCR</b> |                                                       |
| proACT2_F         | CGTTTCGCTTTCCTTAGTGTTAGCT                             |
| proACT2_R         | CACAACGCATGCTAAACAGATCTAG                             |
| proPIN3(P1)_F     | GAGAATATAGGCTAAAATTTATGTCG                            |
| proPIN3(P1)_R     | CTAATATCTTGGTACCCCGGCTA                               |
| proPIN3(P2)_F     | GATAAGATCGATAAAAAATGTAACATA                           |
| proPIN3(P2)_R     | CTTGAAGGGACAAAAATGGA                                  |
| proFLP(P1)_F      | CGTAACATAATGGCAAGTGTTTTTCTTACA                        |
| proFLP(P1)_R      | GAACCACACATTTTCTTGATTCAATCTG                          |
| proFLP(P2)_F      | CGAATCAGAGGAATTATATTGGCAG                             |
| proFLP(P2)_R      | TTTTCTTCTTCTTCTTCTTACTACTGT                           |
| <b>Q-RT-PCR</b>   |                                                       |
| PIN1_F            | TACTCCGAGACCTTCCAACACTACG                             |
| PIN1_R            | TCCACCGCCACCACTTCC                                    |
| PIN3_F            | GAGGGAGAAGGAAGAAAGGGAAAC                              |
| PIN3_R            | CTTGGCTTGTAATGTTGGCATCAG                              |
| FLP_F             | CGAAATGCCACTGGTATTGATAGC                              |
| FLP_R             | CACCATCACTCTCATTACATTGC                               |
| MYB88_F           | GAGGAGATTCACCTTTCGGCTTTTAG                            |
| MYB88_R           | AGGATTGCTTGTTGTGTTAACTCAG                             |
| ACR4_F            | GATCATAGTGCGGTCTGTTGG                                 |
| ACR4_R            | AGGGATAGAAGCAGGGAAACC                                 |
| GATA23_F          | AGTGAGAATGAAAGAAGAGAAGGG                              |
| GATA23_R          | GTGGCTGCGAATAATATGAATACC                              |
| IAA19_F           | GTGGTGACGCTGAGAAGGTT                                  |
| IAA19_R           | CGTGGTCGAAGCTTCCTTAC                                  |
| ACT2_F            | TTGACTACGAGCAGGAGATGG                                 |
| ACT2_R            | ACAAACGAGGGCTGGAACAAG                                 |
| YFP_F1            | ACGGCAGCGTGCAGCTCGCCGACC                              |
| YFP_R             | CTCCAGCAGGACCATGTGATCGCG                              |

| <b>Yeast-one-hybrid</b>     |                                         |
|-----------------------------|-----------------------------------------|
| proPIN3FR1_F                | AAAGAGCTCAGCAACACTAAGTCACAAGA           |
| proPIN3FR1_R                | AAAGTCGACTTAACTTTTTAACC AAAACAAAAT      |
| proPIN3FR2_F                | AAAGAGCTCACCGATCATCTCTACTAAATTCA        |
| proPIN3FR2_R                | AAAGTCGACATTCTCTAACTAATCCATTTTCGTA      |
| proPIN3FR3_F                | AAAGAGCTCGTGAAAGAAAGGTAAAGTAAATAT       |
| proPIN3FR3_R                | AAAGTCGACACATAAATAGTCAAATAATTA AAA      |
| proPIN3FR4_F                | AAAGAGCTCGTATGTTGTTATCTACAATATGTCCGTTT  |
| proPIN3FR4_R                | AAAGTCGACAAAAAATAACAATATAGTTCTTTTC      |
| proPIN3FR5_F                | AAAGAGCTCGATAAGATCGATAAAAAATGTAACATA    |
| proPIN3FR5_R                | AAAGTCGACCTTGAAGGGACAAAAATGGA           |
| proPIN3_FBS1_F              | TGATTATTAGCCGGGGTACCAAGATA              |
| proPIN3_FBS1_R              | TCGATATCTTGGTACCCCGGCTAATAATCAAGCT      |
| proPIN3_mFBS1_F             | TGATTATTAATTAGGGTACCAAGATA              |
| proPIN3_mFBS1_R             | TCGATATCTTGGTACCCTAATTAATAATCAAGCT      |
| proPIN3_FBS2_F              | TAGTAATATACCCATATGTTTAATAT              |
| proPIN3_FBS2_R              | TCGAATATTAACATATGGGTATATTACTAAGCT       |
| proPIN3_AuxRE1_F            | CCTACTTCACGAGACAAATAAGTAAACC            |
| proPIN3_AuxRE1_R            | TCGAGGTTTACTTATTTGTCTCGTGAAGTAGGAGCT    |
| proPIN3_AuxRE2_F            | CTTAGTGGATCTTCTTTGTCTCCAGCCCATC         |
| proPIN3_AuxRE2_R            | TCGAGATGGGCTGGAGACAAAGAAGATCCACTAAGAGCT |
| proPIN3_AuxRE3_F            | CCCATCTTGTCTCCTTATTTTTCTAATGAT          |
| proPIN3_AuxRE3_R            | TCGAATCATTAGAAAAATAAGGAGACAAGATGGGAGCT  |
| proPIN3_mAuxR1_F            | CCTACTTCACTCAGCAAATAAGTAAACC            |
| proPIN3_mAuxR1_R            | TCGAGGTTTACTTATTTGTCTGAGTGAAGTAGGAGCT   |
| proPIN3_mAuxR2_F            | CTTAGTGGATCTTCTTCACTTCCAGCCCATC         |
| proPIN3_mAuxR2_R            | TCGAGATGGGCTGGAAGTGAAGAAGATCCACTAAGAGCT |
| proPIN3_mAuxR3_F            | CCCATCTCACAACCTTATTTTTCTAATGAT          |
| proPIN3_mAuxR3_R            | TCGAATCATTAGAAAAATAAGGTTGTGAGATGGGAGCT  |
| <b>Promoter Mutagenesis</b> |                                         |
| proPIN3_mAuxRE1_F           | CTTCACTCAGCAAATAAGTAAACC                |
| proPIN3_mAuxRE1_R           | GGTTTACTTATTTGTCTGAGTGAAG               |

|                   |                                   |
|-------------------|-----------------------------------|
| proPIN3_mAuxRE2_F | GGATCTTCTTCACTTCCAGCCCATCT        |
| proPIN3_mAuxRE2_R | AGATGGGCTGGAAGTGAAGAAGATCC        |
| proPIN3_mAuxRE3_F | CATCTCACTTCCTTATTTTTCTAATG        |
| proPIN3_mAuxRE3_R | CATTAGAAAAATAAGGAAGTGAGATG        |
| proPIN3_mFBS1_R   | GTACCCTAATTAATAATCAAAAAAGCAATAGTT |
| proPIN3_mFBS1_F   | GATTATTAATTAGGGTACCAAGATATTAG     |

### SUPPLEMENTARY REFERENCES

- 1 Grieneisen, V. A., Xu, J., Maree, A. F., Hogeweg, P. & Scheres, B. Auxin transport is sufficient to generate a maximum and gradient guiding root growth. *Nature* **449**, 1008-1013, (2007).
- 2 Jönsson, H., Heisler, M. G., Shapiro, B. E., Meyerowitz, E. M. & Mjolsness, E. An auxin-driven polarized transport model for phyllotaxis. *Proc. Natl. Acad. Sci. U. S. A.* **103**, 1633-1638, (2006).
- 3 Mitchison, G. J. The Dynamics of Auxin Transport. *Proc R Soc Ser B-Bio* **209**, 489-511, (1980).
